# Supplementary material for: Dendrimer-coated carbon nanotubes deliver dsRNA and increase the efficacy of gene knockdown in the red flour beetle Tribolium castaneum
Source: PubMed Central journal article supplement (PMC7381663; doi:10.1038/s41598-020-69068-x), 2020-07-24
Supplement: 41598_2020_69068_MOESM1_ESM.pdf [file 41598_2020_69068_MOESM1_ESM.pdf]

Dendrimer-coated carbon nanotubes deliver dsRNA and increase the efficacy of gene knockdown in the red flour beetle *Tribolium castaneum*

Catriona H Edwards<sup>1</sup>, Craig R Christie<sup>1</sup>, Andrea Masotti<sup>2</sup>, Antonella Celluzzi<sup>2</sup>, Andrea Caporali<sup>3</sup>, Ewan M Campbell<sup>4\*</sup>

<sup>1</sup>School of Biological Sciences, University of Aberdeen, Aberdeen, UK

<sup>2</sup>Bambino Gesù Children's Hospital, Research Laboratories, Rome, Italy

<sup>3</sup>Centre for Cardiovascular Science, University of Edinburgh, Edinburgh, UK

<sup>4</sup>Centre for Genome Enabled Biology and Medicine, University of Aberdeen, Aberdeen, UK

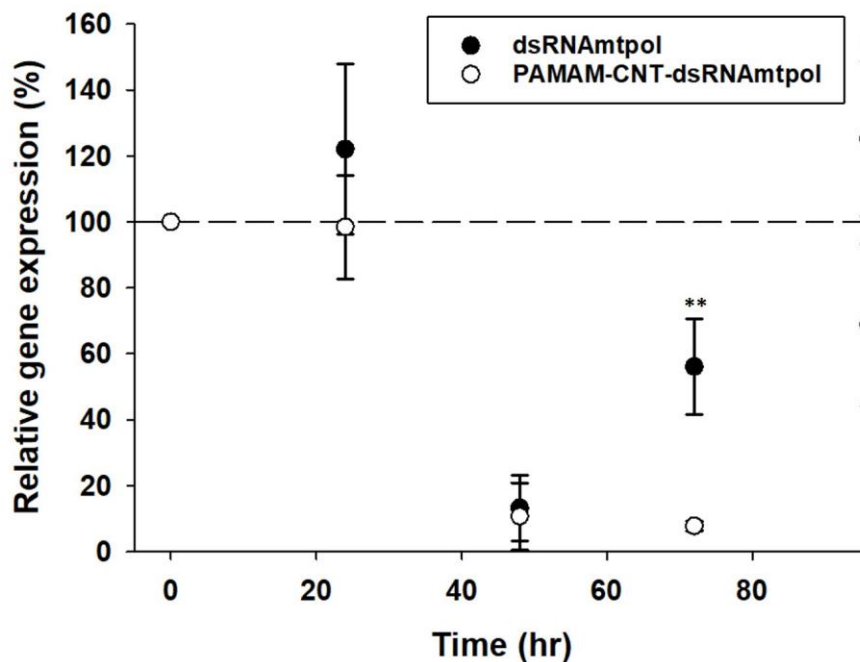

**Figure S1.** Relative normalised gene expression of targets after injection of PAMAM-CNTs, dsRNA or PAMAM-CNT-dsRNA complexes over 96 hr timecourse. *mtpol* expression was significantly decreased following injection of naked dsRNA<sub>mtpol</sub> at 48h ( $P < 0.001$ ) and 72h ( $P < 0.05$ ) post-injection, recovering to control levels at 96h. *mtpol* expression was also significantly reduced in PAMAM-CNT-dsRNA<sub>mtpol</sub> injected larvae at 48h ( $P < 0.001$ ), 72h ( $P < 0.001$ ) and 96h ( $P < 0.05$ ). Expression was significantly lower in PAMAM-CNT-dsRNA<sub>mtpol</sub> compared to dsRNA<sub>mtpol</sub> alone at 72h ( $P < 0.01$ ) and 96h ( $P < 0.05$ ). Data are presented as means  $\pm$  SEM ( $n = 4$  per treatment) as percentage. Asterixes represent significant difference between treatments determined by Student's t-test.
